# Supplementary material
Source: PubMed Central journal article supplement (PMC7367757)
Supplement: NIHMS1589074-supplement-1.pdf [file NIHMS1589074-supplement-1.pdf]

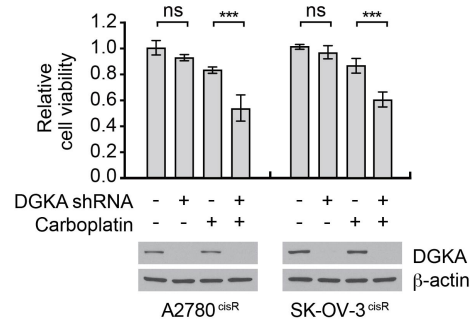

**Supplementary Fig. S1. DGKA knockdown sensitizes ovarian cancer cells to carboplatin treatment.** Cell viability in ovarian cis<sup>R</sup> cancer cells with DGKA knockdown and carboplatin treatment. Stable DGKA knockdown cells were treated with sublethal doses of carboplatin (A2780<sup>cisR</sup>: 25  $\mu$ M, SK-OV-3<sup>cisR</sup>: 50  $\mu$ M) for 72 hours and viability was assessed by CellTiter-Glo luminescent cell viability assay. n=3 technical replicates. Results of one representative experiment from two independent experiments are shown. Error bars represent SD. P values were determined by one-way ANOVA (ns: not significant; \*\*\* $P < 0.001$ ).
