# Supplementary material
Source: PubMed Central journal article supplement (PMC7367757)
Supplement: NIHMS1589074-supplement-2.pdf [file NIHMS1589074-supplement-2.pdf]

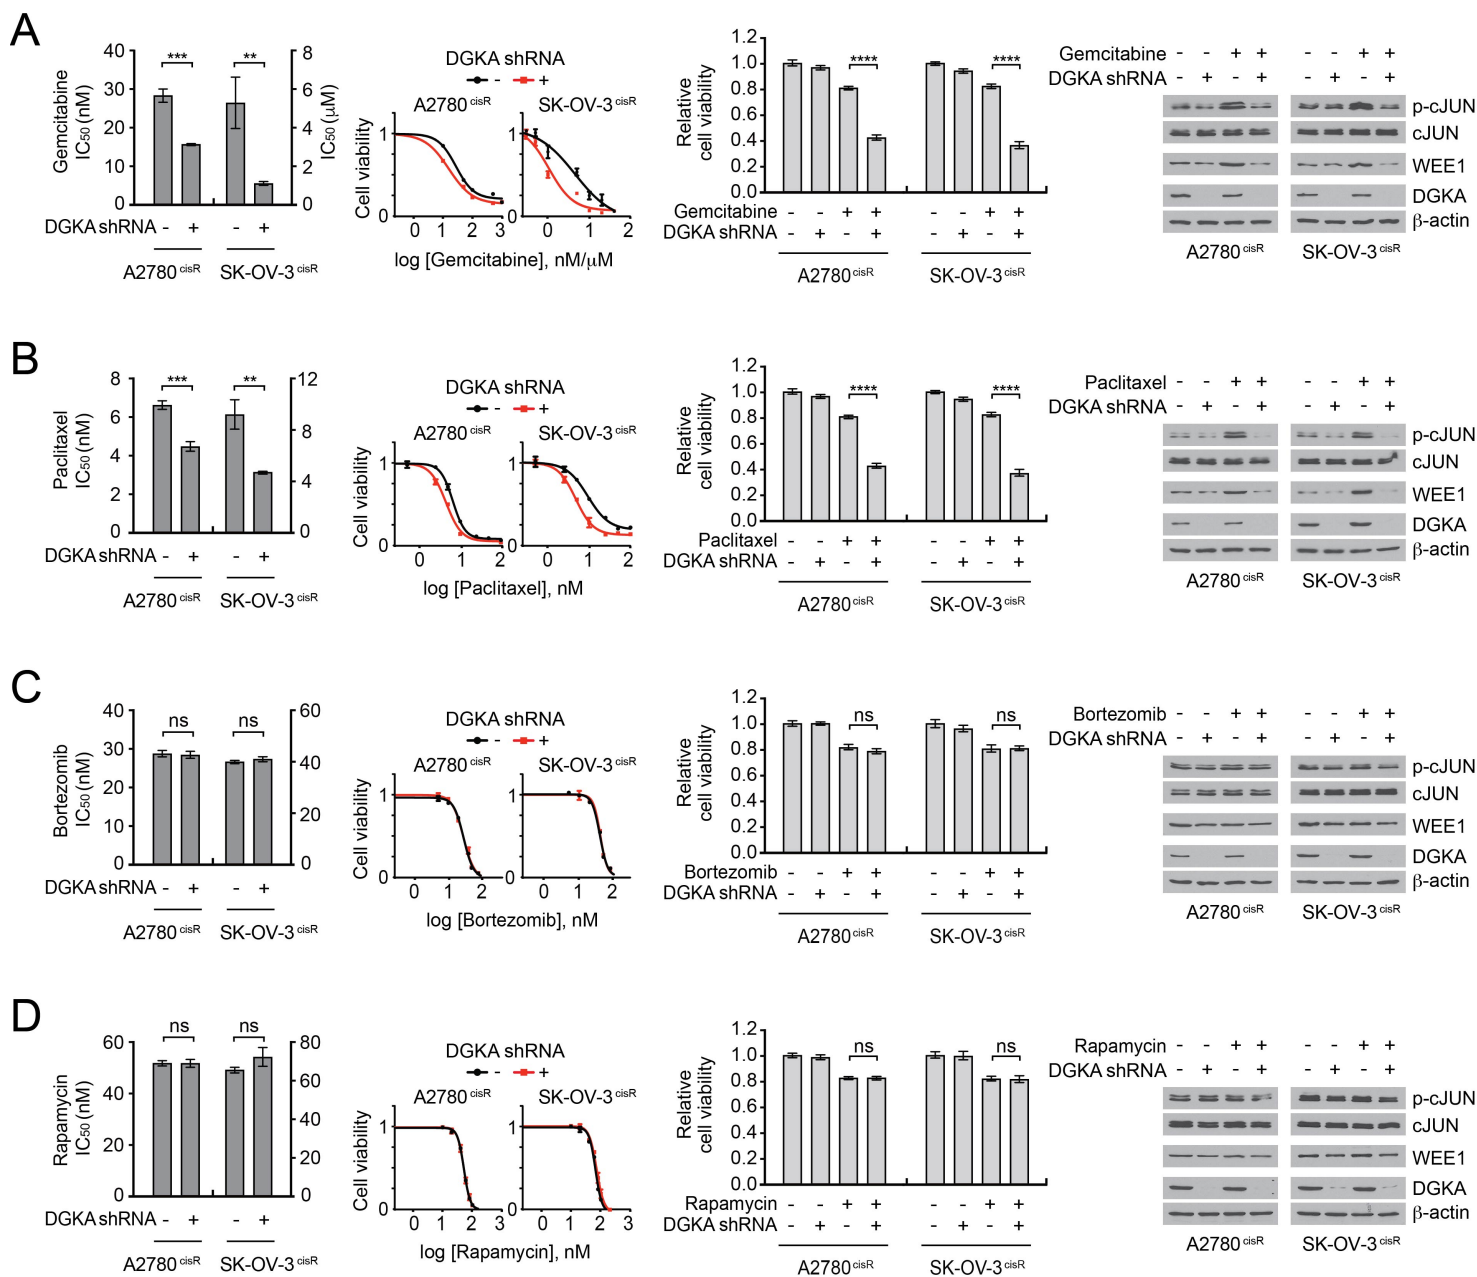

**Supplementary Fig. S2. DGKA knockdown sensitizes ovarian cancer cells to chemotherapy agents but not proteasome inhibitor or mTOR inhibitor.** Effect of DGKA knockdown on response to anticancer agents including gemcitabine (A), paclitaxel (B), bortezomib (C), and rapamycin (D). Drug sensitivity was assessed by  $IC_{50}$  of each drug (*left panels*). Cell viability (*middle panels*) and levels of DGKA downstream effectors (*right panels*) including c-JUN phosphorylation and WEE1 expression were determined in cells with DGKA knockdown and sublethal doses of gemcitabine (1  $\mu$ M), paclitaxel (5 nM), bortezomib (25 nM), and rapamycin (30 nM) treatment.  $n=3$  technical replicates. Results of one representative experiment from two independent experiments are shown. Error bars represent SD. P values were determined by one-way ANOVA (ns: not significant; \*\* $P < 0.01$ ; \*\*\* $P < 0.001$ ; \*\*\*\* $P < 0.0001$ ).
