# Supplementary material
Source: PubMed Central journal article supplement (PMC7367757)
Supplement: NIHMS1589074-supplement-3.pdf [file NIHMS1589074-supplement-3.pdf]

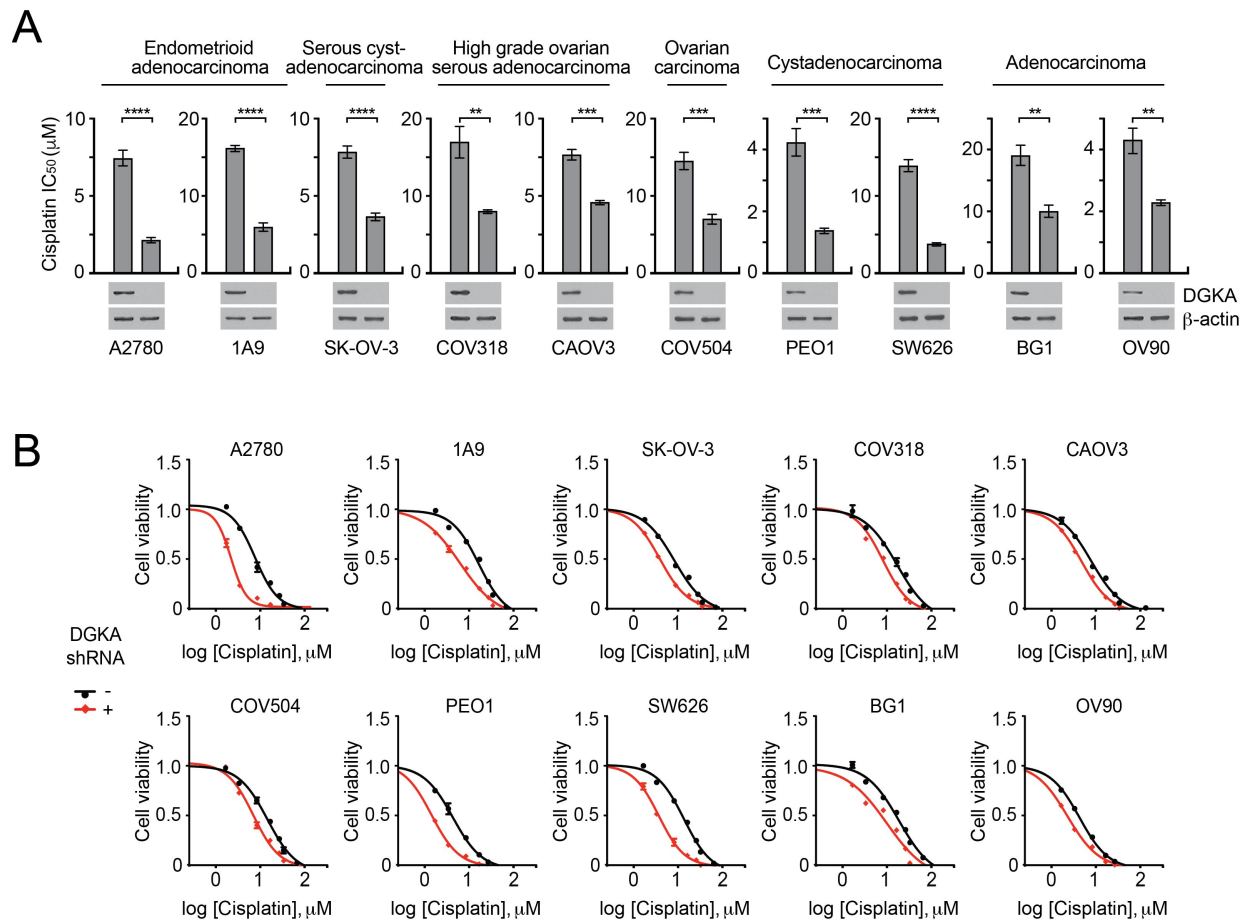

**Supplementary Fig. S3. DGKA knockdown commonly sensitizes diverse subtypes of ovarian cancer cell lines to cisplatin treatment.** Effect of DGKA knockdown on cisplatin sensitivity is shown as cisplatin IC<sub>50</sub> values (A) and viability curves (B). Ovarian cancer cells were treated with increasing concentrations of cisplatin and cell viability was assessed using CellTiter-Glo luminescent cell viability assay. n=3 technical replicates. Results of one representative experiment from two independent experiments are shown. Error bars represent SD. P values were determined by one-way ANOVA (\*\* $P < 0.01$ ; \*\*\* $P < 0.001$ ; \*\*\*\* $P < 0.0001$ ).
