# Supplementary material
Source: PubMed Central journal article supplement (PMC7367757)
Supplement: NIHMS1589074-supplement-4.pdf [file NIHMS1589074-supplement-4.pdf]

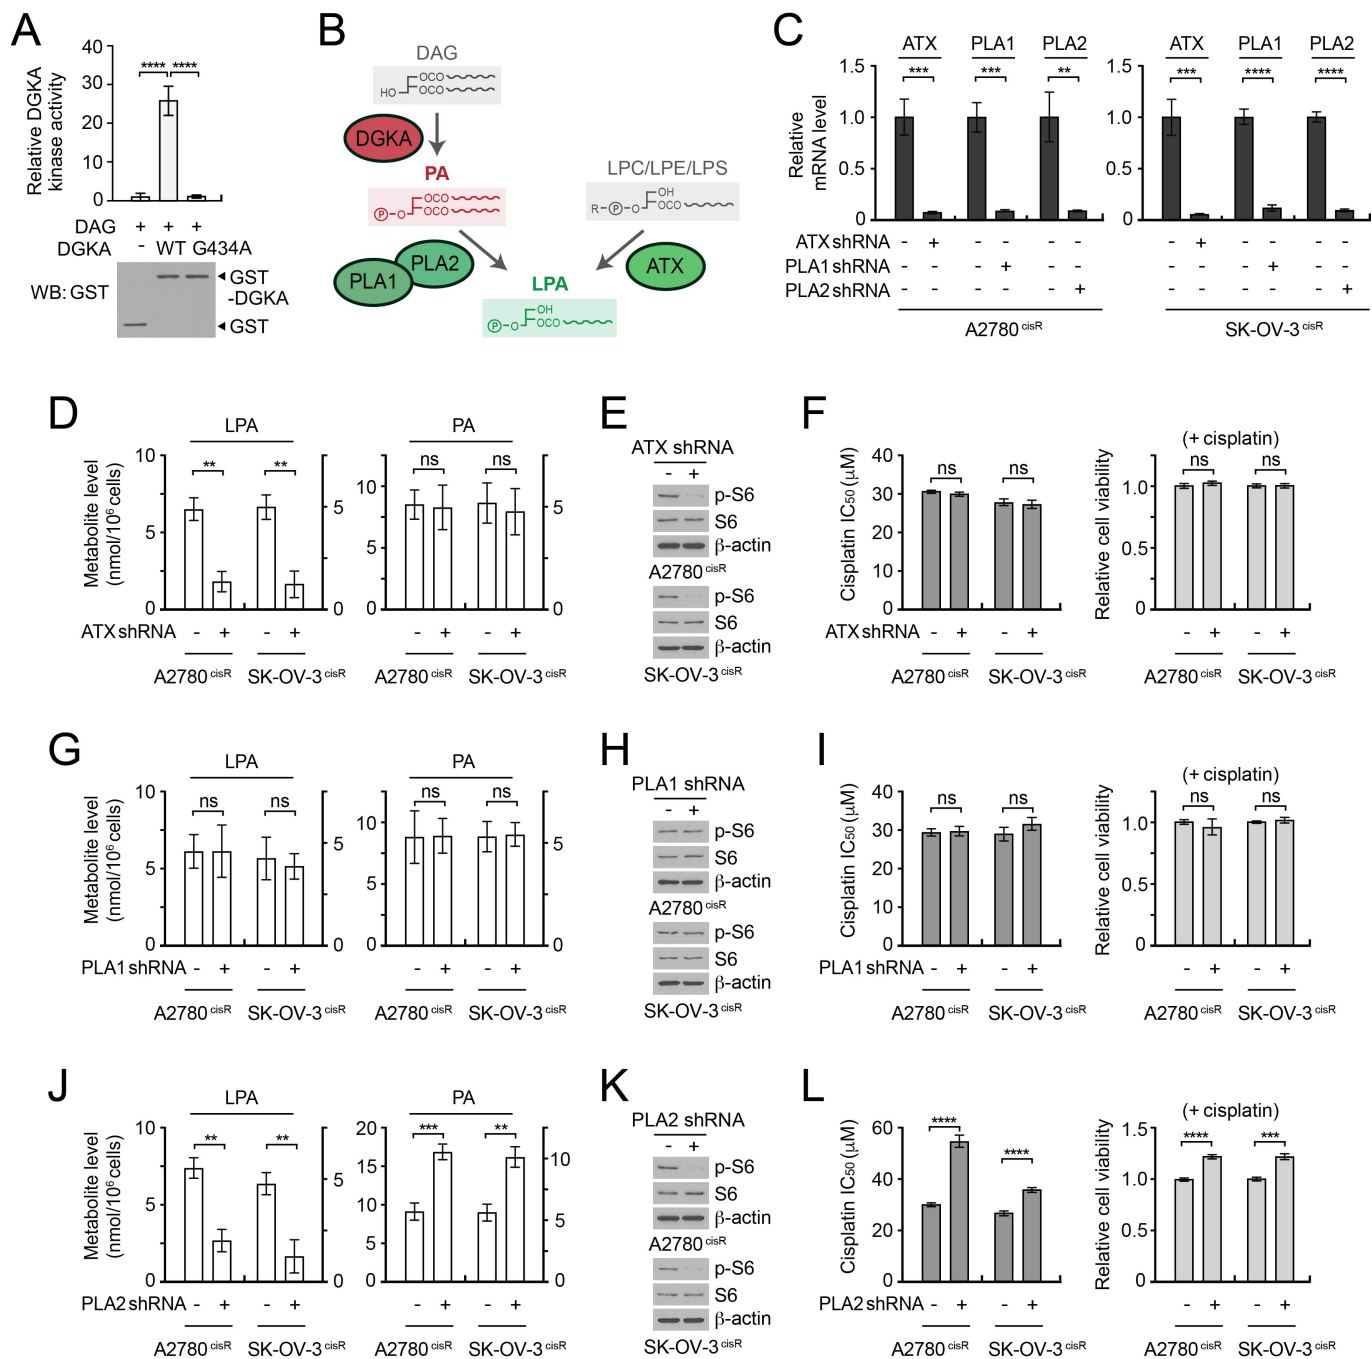

**Supplementary Fig. S4. Cisplatin resistance is mediated by PA but not LPA.** **A**, *In vitro* DGKA kinase assay using DAG as a substrate. DGKA WT and G434A (GA) were enriched from 293T cells. DGKA kinase activity was assessed using ADP-Glo kinase assay. **B**, Schematic view of PA and LPA production in cells. **C**, ATX, PLA1, or PLA2 knockdown efficiency was assessed by quantitative RT-PCR. **D-L**, Intracellular LPA and PA levels (**D**, **G**, **J**), phospho-S6 and S levels (**E**, **H**, **K**), and cisplatin IC<sub>50</sub> and cell viability (**F**, **I**, **L**) in A2780<sup>cisR</sup> and SK-OV-3<sup>cisR</sup> cells with ATX (**D-F**), PLA1 (**G-I**), or PLA2 (**J-L**) knockdown. n=3 technical replicates. Results of one representative experiment from two independent experiments are shown. Error bars represent SD. P values were determined by one-way ANOVA for (**A**) and Student *t* test for (**C-L**) (ns: not significant; \*\**P* < 0.01; \*\*\**P* < 0.001; \*\*\*\**P* < 0.0001).
