# Supplementary material
Source: PubMed Central journal article supplement (PMC7367757)
Supplement: NIHMS1589074-supplement-5.pdf [file NIHMS1589074-supplement-5.pdf]

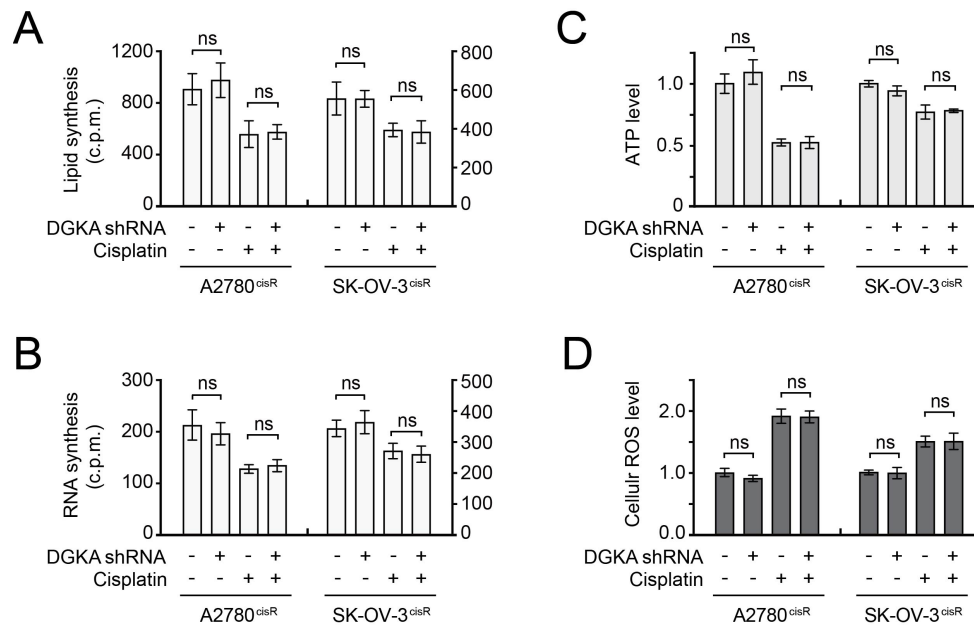

**Supplementary Fig. S5. Target downregulation of DGKA and cisplatin treatment does not alter metabolic features in ovarian cancer cells.** A2780<sup>cisR</sup> and SK-OV-3<sup>cisR</sup> cells with or without DGKA knockdown were treated with sublethal doses of cisplatin (5  $\mu$ g/ml A2780<sup>cisR</sup> and 2  $\mu$ g/ml SK-OV-3<sup>cisR</sup>) for 12 hours (ROS) or 24 hours (lipid, RNA, and ATP). Lipid and RNA synthesis (A and B), intracellular ATP level (C), and ROS level (D) were measured by <sup>14</sup>C-glucose labeling, ATP bioluminescent somatic cell assay, and CM-H<sub>2</sub>DCFDA staining, respectively. n=3 technical replicates. Results of one representative experiment from two independent experiments are shown for all panels. Error bars represent SD. P values were determined by one-way ANOVA (ns: not significant).
