# Supplementary material
Source: PubMed Central journal article supplement (PMC7367757)
Supplement: NIHMS1589074-supplement-6.pdf [file NIHMS1589074-supplement-6.pdf]

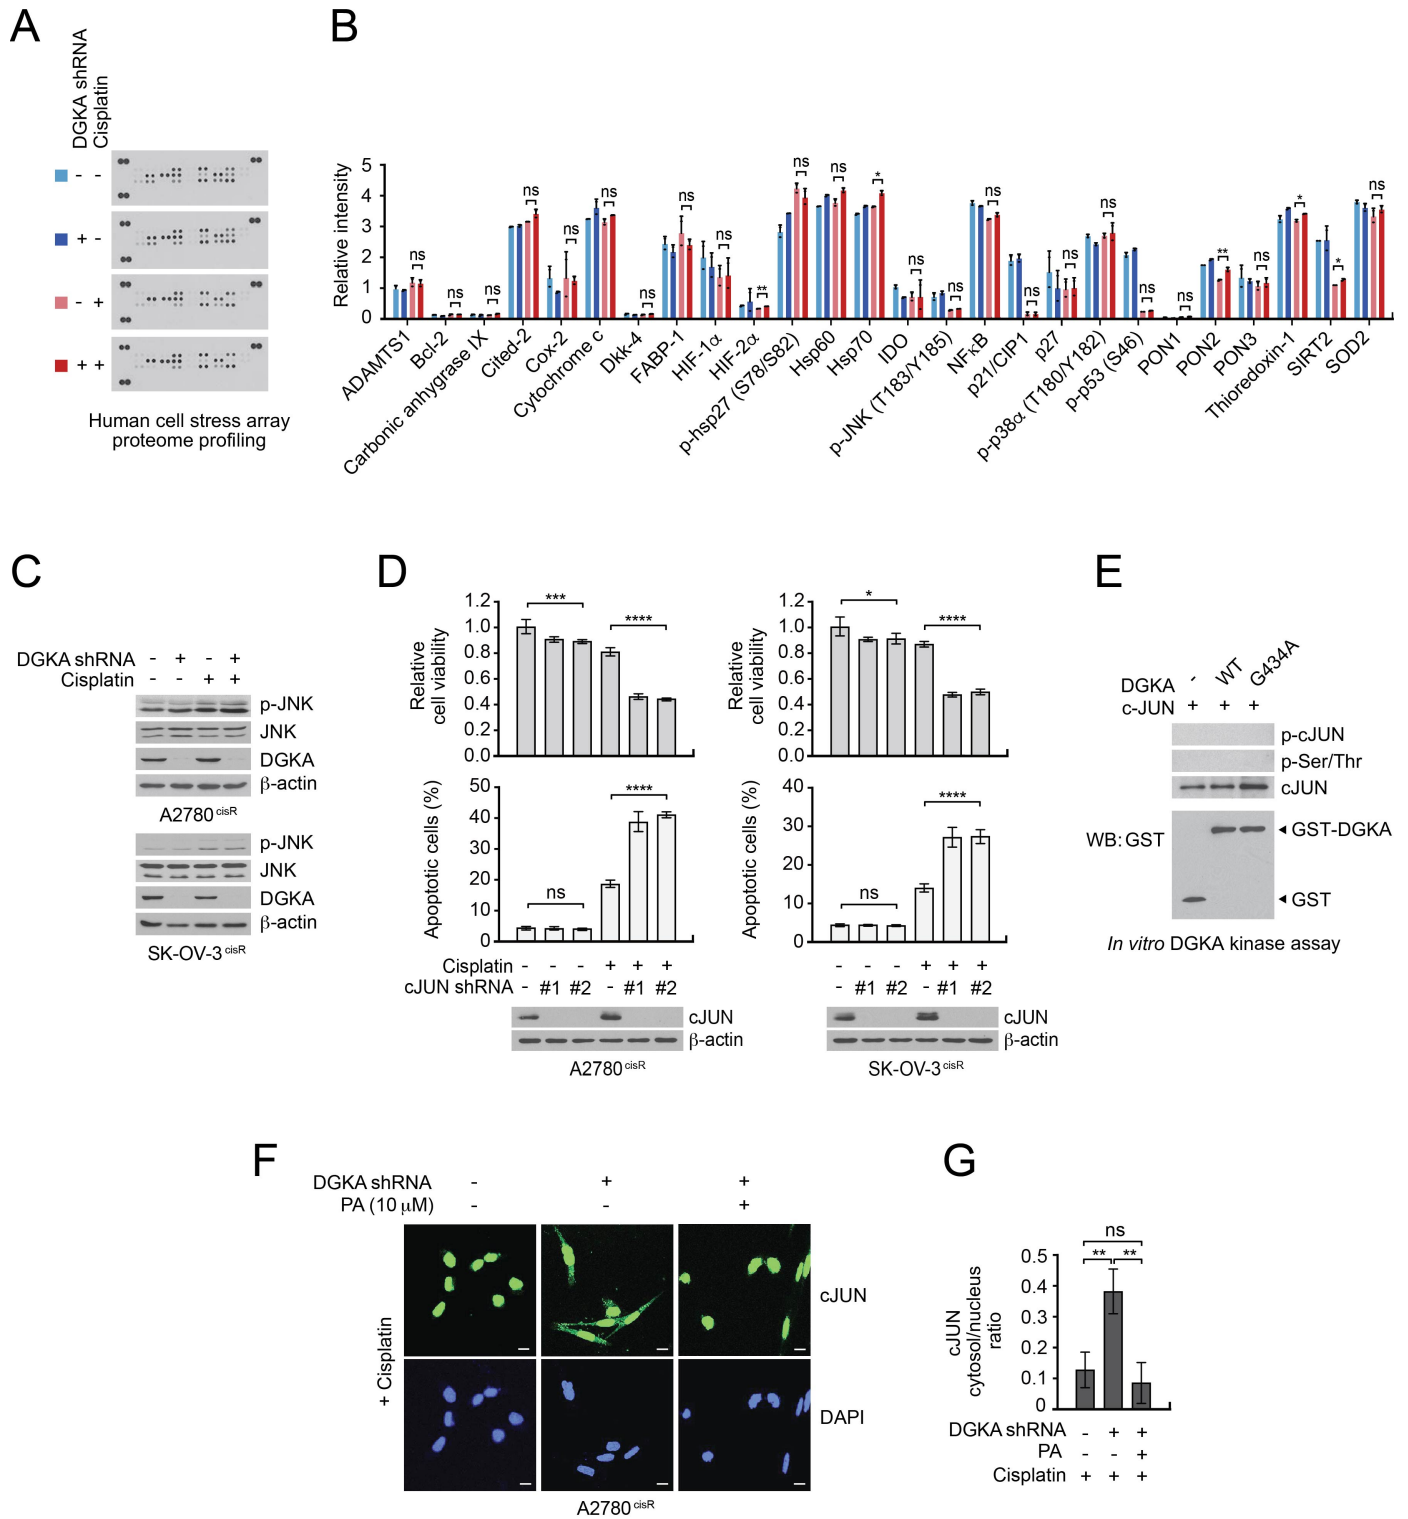

Supplementary Fig. S6 continued

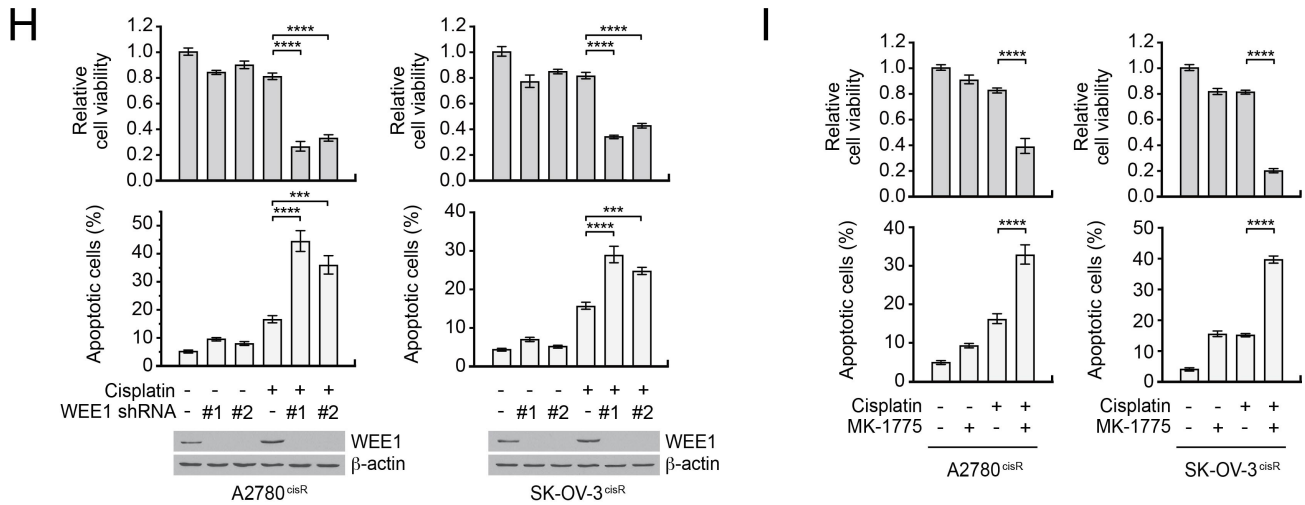

**Supplementary Fig. S6. A and B**, Human cell stress array proteome profiling of A2780<sup>cisR</sup> cells with DGKA knockdown and cisplatin treatment. Cells were treated with a sublethal dose (5  $\mu\text{g/ml}$ ) of cisplatin for 48 hr. Density analysis was performed using ImageJ software. **C**, Phospho-JNK and JNK levels in A2780<sup>cisR</sup> and SK-OV-3<sup>cisR</sup> with DGKA knockdown and cisplatin treatment. Cells were treated with sublethal doses of cisplatin (5  $\mu\text{g/ml}$  A2780<sup>cisR</sup> and 2  $\mu\text{g/ml}$  SK-OV-3<sup>cisR</sup>) for 48 hr. Phospho-JNK Thr183/Tyr185 and JNK levels were assessed by immunoblotting. **D**, Effect of targeting c-JUN on cisplatin-dependent cell viability and apoptotic cell death **E**. *In vitro* DGKA kinase assay using c-JUN as a substrate. Recombinant c-JUN was incubated with GST fused DGKA variants enriched from 293T cells. Antibodies against phospho-cJUN S63 and pan-phospho-serine/threonine were used to detect phosphorylation in c-JUN. **F and G**, PA relocates c-JUN to the nucleus in DGKA knockdown cells with cisplatin treatment. Immunofluorescence staining of c-JUN in A2780<sup>cisR</sup> cells with DGKA knockdown and cisplatin (5  $\mu\text{g/ml}$ ) and PA (10  $\mu\text{M}$ ) treatment. Representative images from three independent experiments are shown in (F). Scale bars represent 10  $\mu\text{m}$ . c-JUN cytosol/nucleus ratio of (F) is shown in (G). **H and I**, Genetic or pharmacological inhibition of WEE1 sensitizes ovarian cancer cells to cisplatin treatment. Effect of WEE1 knockdown (H) or WEE1 inhibitor MK-1775 treatment (I) on cisplatin-dependent cell viability (*upper panels*) and apoptotic cell death (*lower panels*). Stable WEE1 knockdown cells were treated with sublethal doses of cisplatin (A2780<sup>cisR</sup>: 5  $\mu\text{M}$ , SK-OV-3<sup>cisR</sup>: 2  $\mu\text{M}$ ) for 48 hr for (H). Cells were treated with 100 nM of MK-1775 and sublethal doses of cisplatin for 48 hr for (I). Cell viability and apoptosis were assessed by CellTiter-Glo luminescent cell viability assay and Annexin V staining, respectively. Results of one representative experiment from three (D and F-I) and two (A-C and E) independent experiments are shown. Error bars represent SD. P values were determined by one-way ANOVA (ns: not significant; \* $P < 0.05$ ; \*\*\* $P < 0.001$ ; \*\*\*\* $P < 0.0001$ ).
