# Supplementary material
Source: PubMed Central journal article supplement (PMC7367757)
Supplement: NIHMS1589074-supplement-8.pdf [file NIHMS1589074-supplement-8.pdf]

**Supplementary Table S1. Clinical information for ovarian cancer patients whose tumors were evaluated for DGKA expression.**

| Sample # | Gender | Age | Tumor grade           | Disease stage | Treatment history                  | Ethnicity     | Histology                           | Response    |
|----------|--------|-----|-----------------------|---------------|------------------------------------|---------------|-------------------------------------|-------------|
| 1        | F      | 71  | poorly differentiated | III           | Carboplatin/Paclitaxel             | Caucasian     | Papillary carcinoma, serous origin  | Responded   |
| 2        | F      | 59  | poorly differentiated | III           | Carboplatin/Paclitaxel/Bevacizumab | Asian         | Serous carcinoma                    | Responded   |
| 3        | F      | 67  | Not available         | IV            | Carboplatin/Paclitaxel             | Caucasian     | Not available                       | Responded   |
| 4        | F      | 72  | poorly differentiated | IV            | Carboplatin/Paclitaxel             | Caucasian     | Endometrioid carcinoma              | Responded   |
| 5        | F      | 59  | Not available         | III           | Carboplatin/Paclitaxel             | Caucasian     | Epithelial                          | Responded   |
| 6        | F      | 56  | poorly differentiated | IV            | Carboplatin/Paclitaxel             | Asian         | Papillary carcinoma, serous origin  | Responded   |
| 7        | F      | 71  | poorly differentiated | III           | Carboplatin/Paclitaxel             | Caucasian     | Carcinoma                           | Responded   |
| 8        | F      | 65  | poorly differentiated | III           | Carboplatin/Paclitaxel/Bevacizumab | Caucasian     | Papillary carcinoma, serous origin  | Responded   |
| 9        | F      | 60  | Undifferentiated      | III           | Carboplatin/Paclitaxel             | Caucasian     | Serous cyst-adenocarcinoma          | Responded   |
| 10       | F      | 65  | Undifferentiated      | III           | Carboplatin/Paclitaxel             | Caucasian     | Serous cyst-adenocarcinoma          | Responded   |
| 11       | F      | 46  | poorly differentiated | II            | Carboplatin/Paclitaxel             | Asian         | Mixed epithelial carcinoma          | Responded   |
| 12       | F      | 70  | Well differentiated   | IV            | Carboplatin/Paclitaxel             | Asian         | Mucinous adenocarcinoma             | Responded   |
| 13       | F      | 69  | poorly differentiated | III           | Carboplatin/Paclitaxel             | Caucasian     | Serous carcinoma, sarcoma component | Responded   |
| 14       | F      | 66  | Not available         | III           | Carboplatin/Paclitaxel             | Not available | Serous cyst-adenocarcinoma          | Responded   |
| 15       | F      | 87  | Undifferentiated      | III           | Carboplatin/Paclitaxel             | Caucasian     | Carcinosarcoma                      | Responded   |
| 16       | F      | 73  | Not available         | III           | Carboplatin/Paclitaxel             | Not available | Serous carcinoma                    | Responded   |
| 17       | F      | 72  | Poorly differentiated | IV            | Carboplatin/Paclitaxel/Gemcitabine | Caucasian     | Endometrioid carcinoma              | Responded   |
| 18       | F      | 85  | Not available         | IV            | Carboplatin/Paclitaxel/Gemcitabine | Caucasian     | Not available                       | Responded   |
| 19       | F      | 58  | Not available         | III           | Carboplatin/Paclitaxel             | Caucasian     | Not available                       | Responded   |
| 20       | F      | 28  | Not available         | IV            | Carboplatin/Paclitaxel/Bevacizumab | Caucasian     | Not available                       | Responded   |
| 21       | F      | N/A | Not available         | N/A           | Carboplatin/Paclitaxel/Docetaxel   | Not available | Not available                       | Responded   |
| 22       | F      | 46  | Poorly differentiated | III           | Carboplatin/Paclitaxel             | Caucasian     | Papillary carcinoma, serous origin  | No response |
| 23       | F      | 73  | Not available         | IV            | Carboplatin/Paclitaxel             | Caucasian     | Not available                       | No response |
| 24       | F      | 62  | Poorly differentiated | IV            | Carboplatin/Paclitaxel             | Caucasian     | Papillary carcinoma, serous origin  | No response |
| 25       | F      | 76  | Not available         | IV            | Carboplatin/Paclitaxel             | Not available | Adenocarcinoma                      | No response |
| 26       | F      | 55  | Not available         | III           | Carboplatin/Paclitaxel             | Caucasian     | Clear cell carcinoma                | No response |
